# Supplementary material for: Designed self-assembly of a reactive metal–organic framework with quasi α-Po topology
Source: Royal Society of Chemistry journal article supplement (doi:10.1039/b716847k), 2008-01-01
Supplement: b716847k.pdf [file b716847k.pdf]

# **Designed self-assembly of a reactive metal-organic framework with quasi $\alpha$ -Po topology**

**Adonis Michaelides,\* Stavroula Skoulika and Michael G. Siskos**

*Department of Chemistry, University of Ioannina, 45110  
Ioannina, Greece. Fax: 30-26510-98798; Tel: 30-26510-  
98447; E-mail: amihail@cc.uoi.gr*

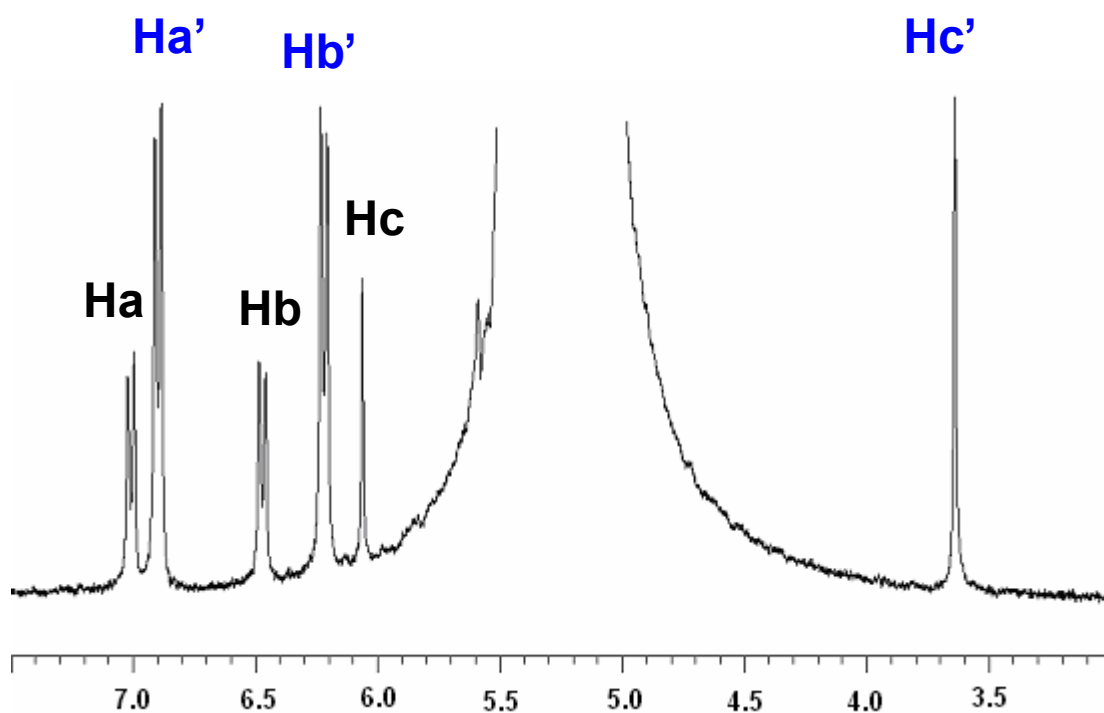

**Fig. 1S:** <sup>1</sup>H-NMR spectrum of a mixture of compounds **2** and **3** in HNO<sub>3</sub>/D<sub>2</sub>O = 3/2. The mixture was obtained by irradiation of **2** for 45 min. The chemical shifts of the non-irradiated sample (compound **2**) are the following: 7.06 ppm (4H, d,  $J=6.25$  Hz, Ha), 6.53 ppm (4H, d,  $J=6.25$  Hz, Hb ) and the olefinic protons at 6.12 ppm (2H, s, olefinic Hc). In this case the band of the hydrogens of fumaric acid is covered by the solvent. The chemical shifts of the product after isomerization (compound **3**) appear at 6.95 ppm (8H, d,  $J=6.25$  Hz, Ha'), 6.27 ppm (8H, d,  $J=6.25$  Hz, Hb') and at 3.70 ppm (8H, s) the cyclobutane ring hydrogens.

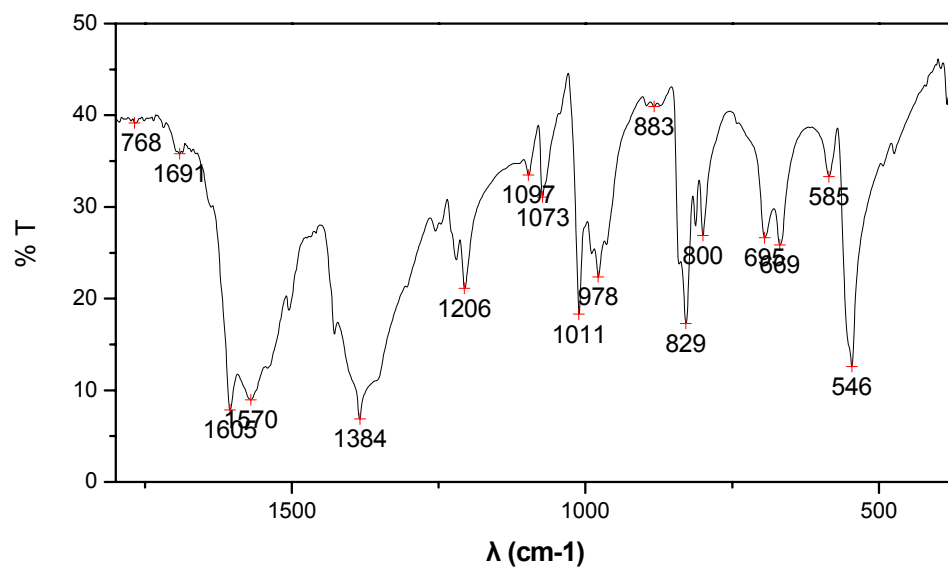

Fig. 2S. IR spectrum of compound 2 (KBr pellet)

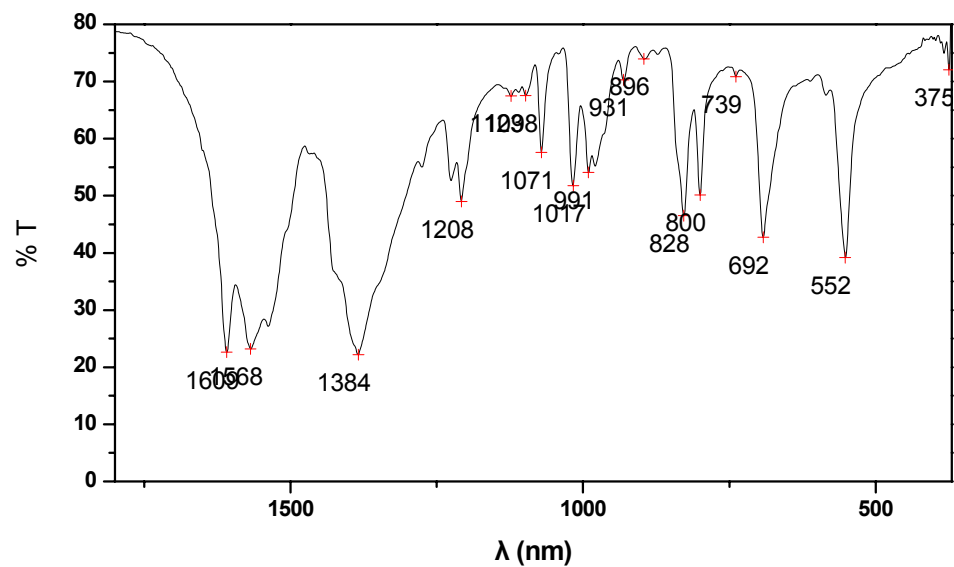

Fig. 3S. IR spectrum of compound 3 (irradiation of 2 for 5 1/2 hours, KBr pellet).

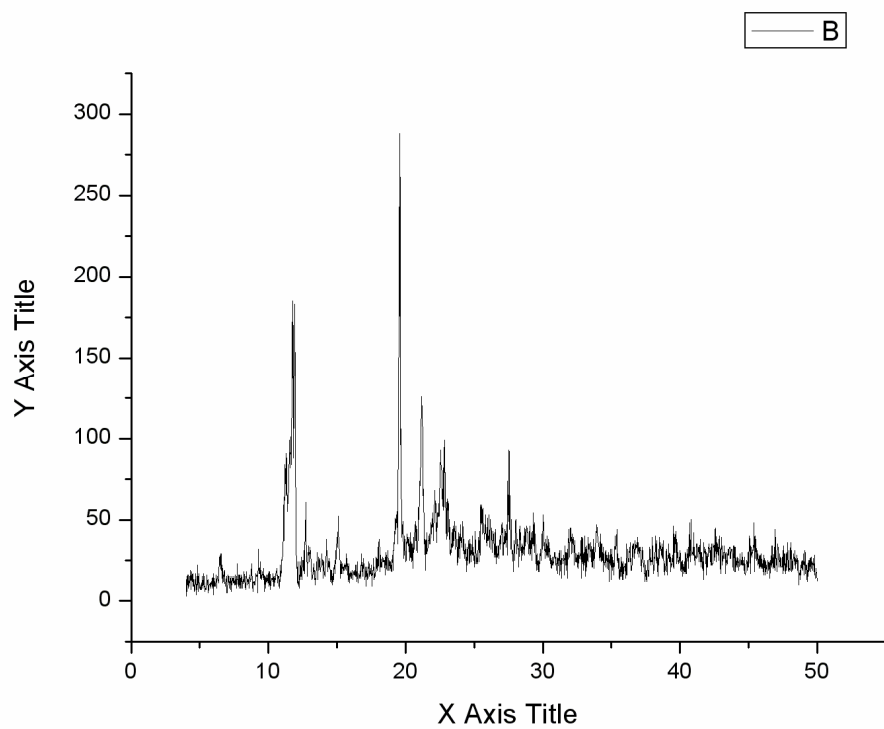

**Fig 4S.** XRPD pattern of compound **2**.

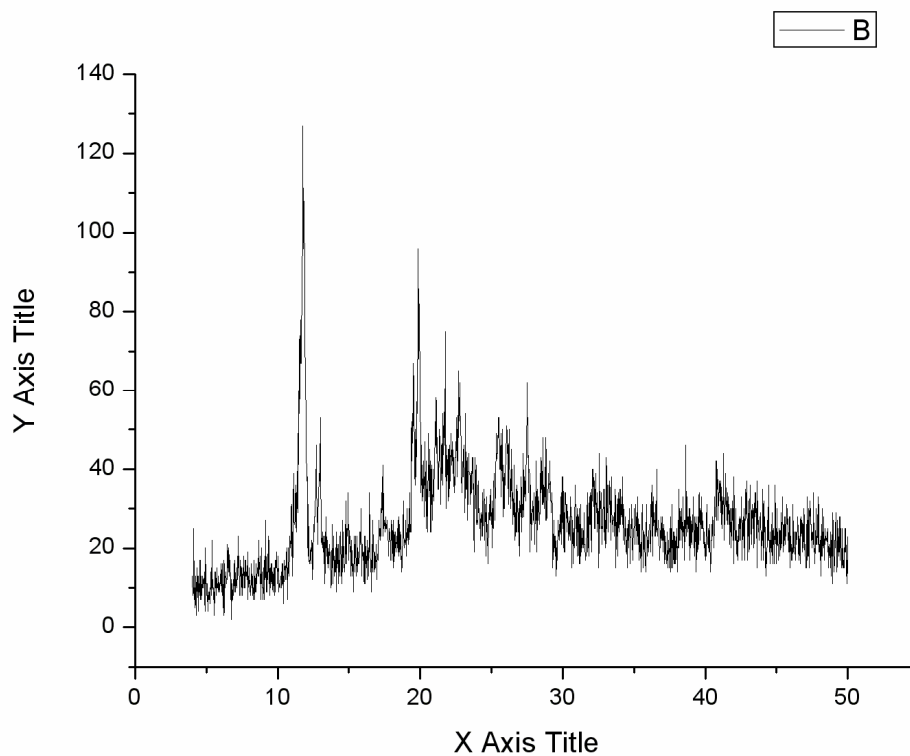

**Fig 5S.** XRPD pattern of compound 3.
